# Supplementary material for: Significance of the inflammatory-immune-nutritional (IINS) score on postoperative survival and recurrence in breast cancer patients: a retrospective study
Source: PeerJ. 2025 Aug 22;13:e19950. doi: 10.7717/peerj.19950 (PMC12377354; doi:10.7717/peerj.19950)
Supplement: Supplemental Information 5 [file peerj-13-19950-s005.xlsx]

## Sheet: Sheet1
Coordinates of the curve						Coordinates of the curve						Coordinates of the curve
Test Outcome Variable.	IINS					Test Outcome Variable.	PLR					Test Outcome Variable.	PNI
is positive when it is greater than or equal to this valuea	sensitivity	1 - Specificity	idiosyncrasy	Jordon index (math.)	0.423789	is positive when it is greater than or equal to this valuea	sensitivity	1 - Specificity	idiosyncrasy	Jordon index (math.)	0.395497	is positive when it is greater than or equal to this valuea	sensitivity	1 - Specificity	idiosyncrasy	Jordon index (math.)	0.428529
29.9	1	1	0	0	48.65	45.6667	1	1	0	0	163.476	31.2	1	1	0	0	43.55
33.4	1	0.993631	0.00636943	0.00636943		48	1	0.993631	0.00636943	0.00636943		32.25	1	0.976744	0.0232558	0.0232558
36.45	0.976744	0.993631	0.00636943	-0.0168864		50.5	1	0.987261	0.0127389	0.0127389		32.65	0.993631	0.976744	0.0232558	0.0168864
37.4	0.953488	0.993631	0.00636943	-0.0401422		52.0833	1	0.980892	0.0191083	0.0191083		33.4	0.993631	0.953488	0.0465116	0.0401422
38.15	0.930233	0.993631	0.00636943	-0.063398		54.1912	1	0.974522	0.0254777	0.0254777		34.5	0.993631	0.930233	0.0697674	0.063398
38.6	0.930233	0.987261	0.0127389	-0.0570286		59.7593	1	0.968153	0.0318471	0.0318471		35.55	0.993631	0.906977	0.0930233	0.0866538
38.85	0.930233	0.980892	0.0191083	-0.0506592		64.7727	1	0.961783	0.0382166	0.0382166		36	0.993631	0.883721	0.116279	0.10991
39.2	0.930233	0.974522	0.0254777	-0.0442897		67.0045	1	0.955414	0.044586	0.044586		36.6	0.993631	0.860465	0.139535	0.133165
39.75	0.930233	0.968153	0.0318471	-0.0379203		69.05	1	0.949045	0.0509554	0.0509554		37.35	0.993631	0.837209	0.162791	0.156421
40.15	0.930233	0.961783	0.0382166	-0.0315509		70.208	1	0.942675	0.0573248	0.0573248		37.85	0.980892	0.837209	0.162791	0.143682
40.3	0.930233	0.955414	0.044586	-0.0251815		70.7962	1	0.936306	0.0636943	0.0636943		38.4	0.974522	0.813953	0.186047	0.160569
40.45	0.930233	0.949045	0.0509554	-0.018812		72.0587	1	0.929936	0.0700637	0.0700637		38.8	0.974522	0.790698	0.209302	0.183825
40.6	0.930233	0.942675	0.0573248	-0.0124426		73.5538	1	0.923567	0.0764331	0.0764331		39.1	0.974522	0.744186	0.255814	0.230336
40.8	0.906977	0.942675	0.0573248	-0.0356984		74.5833	1	0.917197	0.0828025	0.0828025		39.35	0.974522	0.72093	0.27907	0.253592
40.95	0.906977	0.936306	0.0636943	-0.029329		75.45	1	0.910828	0.089172	0.089172		39.45	0.968153	0.72093	0.27907	0.247223
41.1	0.906977	0.910828	0.089172	-0.00385128		76.398	1	0.904459	0.0955414	0.0955414		39.55	0.968153	0.697674	0.302326	0.270478
41.25	0.906977	0.904459	0.0955414	0.00251815		76.9095	1	0.898089	0.101911	0.101911		39.75	0.961783	0.697674	0.302326	0.264109
41.35	0.906977	0.898089	0.101911	0.00888757		77.35	1	0.89172	0.10828	0.10828		39.95	0.961783	0.674419	0.325581	0.287365
41.45	0.906977	0.89172	0.10828	0.015257		77.8171	1	0.88535	0.11465	0.11465		40.2	0.961783	0.651163	0.348837	0.310621
41.55	0.906977	0.878981	0.121019	0.0279959		79.1136	1	0.878981	0.121019	0.121019		40.7	0.955414	0.627907	0.372093	0.327507
41.65	0.906977	0.866242	0.133758	0.0407347		80.5695	1	0.872611	0.127389	0.127389		41.1	0.949045	0.627907	0.372093	0.321138
41.75	0.906977	0.859873	0.140127	0.0471041		81.8655	1	0.866242	0.133758	0.133758		41.25	0.942675	0.627907	0.372093	0.314768
41.9	0.906977	0.853503	0.146497	0.0534736		83.2115	1	0.859873	0.140127	0.140127		41.35	0.936306	0.604651	0.395349	0.331655
42.05	0.906977	0.834395	0.165605	0.0725818		83.6055	1	0.853503	0.146497	0.146497		41.55	0.929936	0.604651	0.395349	0.325285
42.15	0.906977	0.821656	0.178344	0.0853207		85.822	1	0.847134	0.152866	0.152866		41.75	0.917197	0.604651	0.395349	0.312546
42.25	0.906977	0.808917	0.191083	0.0980595		88.2327	1	0.840764	0.159236	0.159236		42.1	0.917197	0.581395	0.418605	0.335802
42.45	0.883721	0.808917	0.191083	0.0748037		90.1948	1	0.834395	0.165605	0.165605		42.45	0.917197	0.55814	0.44186	0.359058
42.65	0.883721	0.796178	0.203822	0.0875426		91.8591	1	0.828025	0.171975	0.171975		42.65	0.917197	0.534884	0.465116	0.382314
42.75	0.883721	0.789809	0.210191	0.093912		92.0025	1	0.821656	0.178344	0.178344		42.85	0.89172	0.534884	0.465116	0.356836
42.9	0.883721	0.770701	0.229299	0.11302		92.615	1	0.815287	0.184713	0.184713		42.95	0.89172	0.511628	0.488372	0.380092
43.05	0.860465	0.751592	0.248408	0.108873		93.229	1	0.808917	0.191083	0.191083		43.05	0.872611	0.511628	0.488372	0.360984
43.15	0.860465	0.745223	0.254777	0.115242		93.5415	1	0.802548	0.197452	0.197452		43.15	0.872611	0.488372	0.511628	0.384239
43.25	0.860465	0.726115	0.273885	0.13435		93.7981	1	0.796178	0.203822	0.203822		43.25	0.853503	0.488372	0.511628	0.365131
43.35	0.860465	0.713376	0.286624	0.147089		93.9231	1	0.789809	0.210191	0.210191		43.35	0.853503	0.44186	0.55814	0.411643
43.45	0.860465	0.707006	0.292994	0.153459		94.0833	1	0.783439	0.216561	0.216561		43.45	0.847134	0.44186	0.55814	0.405273
43.6	0.860465	0.700637	0.299363	0.159828		94.1833	1	0.77707	0.22293	0.22293		43.55	0.847134	0.418605	0.581395	0.428529
43.75	0.860465	0.694268	0.305732	0.166198		94.8273	1	0.770701	0.229299	0.229299		43.8	0.834395	0.418605	0.581395	0.41579
43.85	0.860465	0.681529	0.318471	0.178936		95.4772	1	0.764331	0.235669	0.235669		44.05	0.828025	0.418605	0.581395	0.409421
43.95	0.860465	0.675159	0.324841	0.185306		96.083	1	0.757962	0.242038	0.242038		44.15	0.815287	0.418605	0.581395	0.396682
44.1	0.860465	0.66879	0.33121	0.191675		98.333	1	0.751592	0.248408	0.248408		44.25	0.815287	0.395349	0.604651	0.419938
44.25	0.860465	0.656051	0.343949	0.204414		100.588	0.976744	0.745223	0.254777	0.231521		44.35	0.808917	0.395349	0.604651	0.413568
44.35	0.860465	0.636943	0.363057	0.223522		101.255	0.953488	0.745223	0.254777	0.208265		44.5	0.802548	0.395349	0.604651	0.407199
44.5	0.860465	0.617834	0.382166	0.242631		102	0.953488	0.738854	0.261146	0.214635		44.65	0.77707	0.395349	0.604651	0.381721
44.7	0.860465	0.611465	0.388535	0.249		103	0.953488	0.732484	0.267516	0.221004		44.8	0.770701	0.395349	0.604651	0.375352
44.85	0.860465	0.592357	0.407643	0.268108		104.583	0.930233	0.732484	0.267516	0.197748		44.95	0.751592	0.395349	0.604651	0.356244
45	0.860465	0.585987	0.414013	0.274478		107.083	0.930233	0.726115	0.273885	0.204118		45.05	0.719745	0.395349	0.604651	0.324396
45.15	0.860465	0.579618	0.420382	0.280847		108.541	0.930233	0.719745	0.280255	0.210487		45.15	0.707006	0.395349	0.604651	0.311658
45.25	0.860465	0.573248	0.426752	0.287217		109.643	0.930233	0.713376	0.286624	0.216857		45.25	0.694268	0.395349	0.604651	0.298919
45.35	0.860465	0.566879	0.433121	0.293586		110.625	0.930233	0.707006	0.292994	0.223226		45.35	0.681529	0.395349	0.604651	0.28618
45.45	0.860465	0.547771	0.452229	0.312694		111.511	0.930233	0.700637	0.299363	0.229596		45.45	0.675159	0.372093	0.627907	0.303066
45.55	0.837209	0.535032	0.464968	0.302177		112.329	0.930233	0.694268	0.305732	0.235965		45.55	0.66242	0.372093	0.627907	0.290327
45.65	0.837209	0.528662	0.471338	0.308547		113.426	0.930233	0.687898	0.312102	0.242334		45.65	0.649682	0.348837	0.651163	0.300844
45.75	0.837209	0.515924	0.484076	0.321286		114.942	0.930233	0.681529	0.318471	0.248704		45.75	0.643312	0.348837	0.651163	0.294475
45.9	0.837209	0.496815	0.503185	0.340394		116.025	0.930233	0.675159	0.324841	0.255073		45.85	0.636943	0.325581	0.674419	0.311361
46.05	0.813953	0.484076	0.515924	0.329877		116.944	0.930233	0.66879	0.33121	0.261443		46	0.624204	0.325581	0.674419	0.298622
46.15	0.790698	0.471338	0.528662	0.31936		117.524	0.930233	0.66242	0.33758	0.267812		46.15	0.617834	0.325581	0.674419	0.292253
46.3	0.790698	0.464968	0.535032	0.32573		119.439	0.930233	0.656051	0.343949	0.274182		46.25	0.605096	0.325581	0.674419	0.279514
46.45	0.790698	0.458599	0.541401	0.332099		121.476	0.930233	0.649682	0.350318	0.280551		46.35	0.598726	0.302326	0.697674	0.296401
46.6	0.790698	0.452229	0.547771	0.338468		123.45	0.930233	0.643312	0.356688	0.28692		46.45	0.566879	0.302326	0.697674	0.264553
46.8	0.790698	0.44586	0.55414	0.344838		126.35	0.930233	0.636943	0.363057	0.29329		46.55	0.56051	0.302326	0.697674	0.258184
46.95	0.767442	0.44586	0.55414	0.321582		127.797	0.930233	0.630573	0.369427	0.299659		46.65	0.541401	0.302326	0.697674	0.239076
47.05	0.767442	0.433121	0.566879	0.334321		128.158	0.930233	0.624204	0.375796	0.306029		46.75	0.522293	0.302326	0.697674	0.219967
47.15	0.767442	0.414013	0.585987	0.353429		128.756	0.930233	0.617834	0.382166	0.312398		46.85	0.503185	0.302326	0.697674	0.200859
47.25	0.767442	0.401274	0.598726	0.366168		130.072	0.930233	0.611465	0.388535	0.318768		47.1	0.496815	0.302326	0.697674	0.19449
47.4	0.744186	0.401274	0.598726	0.342912		132.193	0.930233	0.605096	0.394904	0.325137		47.35	0.490446	0.302326	0.697674	0.18812
47.55	0.744186	0.394904	0.605096	0.349282		133.567	0.906977	0.605096	0.394904	0.301881		47.45	0.484076	0.302326	0.697674	0.181751
47.65	0.744186	0.388535	0.611465	0.355651		133.857	0.906977	0.598726	0.401274	0.308251		47.6	0.471338	0.302326	0.697674	0.169012
47.75	0.72093	0.375796	0.624204	0.345134		134.229	0.883721	0.598726	0.401274	0.284995		47.8	0.471338	0.255814	0.744186	0.215524
47.85	0.72093	0.363057	0.636943	0.357873		136.39	0.883721	0.592357	0.407643	0.291364		47.95	0.464968	0.255814	0.744186	0.209154
47.95	0.72093	0.343949	0.656051	0.376981		138.318	0.883721	0.585987	0.414013	0.297734		48.1	0.44586	0.255814	0.744186	0.190046
48.05	0.72093	0.33121	0.66879	0.38972		139.2	0.883721	0.579618	0.420382	0.304103		48.25	0.433121	0.255814	0.744186	0.177307
48.15	0.72093	0.324841	0.675159	0.396089		140.909	0.860465	0.566879	0.433121	0.293586		48.35	0.420382	0.255814	0.744186	0.164568
48.25	0.697674	0.324841	0.675159	0.372834		144.409	0.860465	0.56051	0.43949	0.299956		48.5	0.401274	0.255814	0.744186	0.14546
48.35	0.697674	0.318471	0.681529	0.379203		147.786	0.860465	0.55414	0.44586	0.306325		48.65	0.401274	0.232558	0.767442	0.168716
48.45	0.697674	0.299363	0.700637	0.398311		148.619	0.860465	0.547771	0.452229	0.312694		48.8	0.382166	0.232558	0.767442	0.149607
48.55	0.697674	0.286624	0.713376	0.41105		150.896	0.860465	0.541401	0.458599	0.319064		49	0.369427	0.232558	0.767442	0.136869
48.65	0.697674	0.273885	0.726115	0.423789		153.915	0.860465	0.535032	0.464968	0.325433		49.2	0.363057	0.209302	0.790698	0.153755
48.75	0.651163	0.261146	0.738854	0.390016		154.732	0.860465	0.528662	0.471338	0.331803		49.35	0.350318	0.209302	0.790698	0.141016
48.85	0.651163	0.248408	0.751592	0.402755		155.158	0.860465	0.522293	0.477707	0.338172		49.5	0.33758	0.209302	0.790698	0.128277
49.1	0.627907	0.242038	0.757962	0.385869		155.96	0.860465	0.515924	0.484076	0.344542		49.65	0.33121	0.209302	0.790698	0.121908
49.4	0.627907	0.235669	0.764331	0.392238		156.682	0.860465	0.509554	0.490446	0.350911		49.75	0.292994	0.209302	0.790698	0.0836913
49.55	0.627907	0.229299	0.770701	0.398608		157.071	0.860465	0.503185	0.496815	0.35728		49.85	0.286624	0.209302	0.790698	0.0773219
49.65	0.581395	0.22293	0.77707	0.358465		157.221	0.860465	0.496815	0.503185	0.36365		49.95	0.273885	0.209302	0.790698	0.064583
49.75	0.55814	0.216561	0.783439	0.341579		157.881	0.860465	0.484076	0.515924	0.376389		50.05	0.267516	0.209302	0.790698	0.0582136
49.85	0.55814	0.210191	0.789809	0.347948		159.525	0.860465	0.477707	0.522293	0.382758		50.15	0.261146	0.162791	0.837209	0.0983558
49.95	0.55814	0.197452	0.802548	0.360687		161.627	0.860465	0.471338	0.528662	0.389128		50.25	0.254777	0.162791	0.837209	0.0919864
50.15	0.55814	0.191083	0.808917	0.367057		163.476	0.860465	0.464968	0.535032	0.395497		50.35	0.248408	0.116279	0.883721	0.132129
50.35	0.534884	0.184713	0.815287	0.35017		165.219	0.837209	0.458599	0.541401	0.378611		50.45	0.242038	0.0930233	0.906977	0.149015
50.55	0.534884	0.171975	0.828025	0.362909		166.327	0.837209	0.452229	0.547771	0.38498		50.55	0.242038	0.0697674	0.930233	0.172271
50.75	0.534884	0.165605	0.834395	0.369279		166.583	0.813953	0.452229	0.547771	0.361724		50.65	0.235669	0.0697674	0.930233	0.165901
50.85	0.534884	0.159236	0.840764	0.375648		166.944	0.790698	0.44586	0.55414	0.344838		50.85	0.229299	0.0697674	0.930233	0.159532
50.95	0.534884	0.152866	0.847134	0.382017		168.056	0.790698	0.43949	0.56051	0.351207		51.25	0.22293	0.0697674	0.930233	0.153162
51.05	0.511628	0.146497	0.853503	0.365131		169.087	0.790698	0.433121	0.566879	0.357577		51.55	0.210191	0.0465116	0.953488	0.163679
51.2	0.511628	0.11465	0.88535	0.396978		169.976	0.790698	0.426752	0.573248	0.363946		51.75	0.197452	0.0465116	0.953488	0.150941
51.35	0.511628	0.10828	0.89172	0.403348		171.333	0.767442	0.426752	0.573248	0.34069		52.05	0.191083	0.0465116	0.953488	0.144571
51.45	0.488372	0.101911	0.898089	0.386461		172.667	0.767442	0.420382	0.579618	0.34706		52.25	0.184713	0.0465116	0.953488	0.138202
51.55	0.465116	0.101911	0.898089	0.363205		173.939	0.744186	0.420382	0.579618	0.323804		52.35	0.171975	0.0465116	0.953488	0.125463
51.65	0.465116	0.0955414	0.904459	0.369575		175.773	0.744186	0.414013	0.585987	0.330173		52.45	0.159236	0.0465116	0.953488	0.112724
51.95	0.418605	0.0955414	0.904459	0.323063		177.429	0.744186	0.407643	0.592357	0.336543		52.55	0.146497	0.0465116	0.953488	0.0999852
52.25	0.395349	0.0955414	0.904459	0.299807		178.929	0.72093	0.407643	0.592357	0.313287		52.65	0.133758	0.0465116	0.953488	0.0872463
52.35	0.372093	0.0955414	0.904459	0.276552		181.765	0.72093	0.401274	0.598726	0.319656		52.8	0.127389	0.0465116	0.953488	0.0808769
52.7	0.372093	0.089172	0.910828	0.282921		183.64	0.697674	0.401274	0.598726	0.296401		52.95	0.10828	0.0465116	0.953488	0.0617686
53.15	0.372093	0.0828025	0.917197	0.28929		184.148	0.674419	0.401274	0.598726	0.273145		53.25	0.0955414	0.0465116	0.953488	0.0490298
53.4	0.372093	0.0764331	0.923567	0.29566		185.13	0.674419	0.394904	0.605096	0.279514		53.65	0.0955414	0.0232558	0.976744	0.0722856
53.55	0.372093	0.0700637	0.929936	0.302029		186.057	0.651163	0.394904	0.605096	0.256258		53.85	0.089172	0.0232558	0.976744	0.0659162
53.65	0.325581	0.0700637	0.929936	0.255518		186.533	0.651163	0.388535	0.611465	0.262628		54	0.0828025	0.0232558	0.976744	0.0595467
53.75	0.325581	0.0636943	0.936306	0.261887		186.795	0.627907	0.388535	0.611465	0.239372		54.15	0.0764331	0.0232558	0.976744	0.0531773
53.85	0.325581	0.0573248	0.942675	0.268257		187.39	0.627907	0.382166	0.617834	0.245741		54.25	0.0700637	0.0232558	0.976744	0.0468079
54	0.325581	0.0509554	0.949045	0.274626		188.214	0.627907	0.375796	0.624204	0.252111		54.35	0.0636943	0.0232558	0.976744	0.0404385
54.2	0.325581	0.044586	0.955414	0.280995		190.286	0.627907	0.369427	0.630573	0.25848		54.6	0.0573248	0.0232558	0.976744	0.034069
54.45	0.27907	0.044586	0.955414	0.234484		194.462	0.627907	0.363057	0.636943	0.26485		55.15	0.044586	0.0232558	0.976744	0.0213302
54.65	0.27907	0.0318471	0.968153	0.247223		198.462	0.627907	0.356688	0.643312	0.271219		55.65	0.0318471	0.0232558	0.976744	0.00859132
54.85	0.255814	0.0318471	0.968153	0.223967		200.6	0.627907	0.350318	0.649682	0.277589		55.85	0.0318471	0	1	0.0318471
55.35	0.255814	0.0254777	0.974522	0.230336		202.908	0.604651	0.350318	0.649682	0.254333		56.15	0.0254777	0	1	0.0254777
55.8	0.255814	0.0191083	0.980892	0.236706		204.974	0.604651	0.343949	0.656051	0.260702		56.8	0.0191083	0	1	0.0191083
56.1	0.209302	0.0191083	0.980892	0.190194		205.394	0.604651	0.33758	0.66242	0.267072		57.5	0.0127389	0	1	0.0127389
56.45	0.209302	0.0127389	0.987261	0.196563		205.909	0.604651	0.33121	0.66879	0.273441		58.35	0.00636943	0	1	0.00636943
56.75	0.186047	0.0127389	0.987261	0.173308		207.182	0.604651	0.324841	0.675159	0.27981		59.9	0	0	1	0
57.3	0.186047	0.00636943	0.993631	0.179677		209.5	0.581395	0.324841	0.675159	0.256555
58.2	0.162791	0.00636943	0.993631	0.156421		213.5	0.581395	0.318471	0.681529	0.262924
59.2	0.139535	0.00636943	0.993631	0.133165		217.091	0.55814	0.318471	0.681529	0.239668
60.85	0.116279	0.00636943	0.993631	0.10991		220.202	0.55814	0.312102	0.687898	0.246038
62.55	0.116279	0	1	0.116279		222.461	0.55814	0.305732	0.694268	0.252407
66.8	0.0930233	0	1	0.0930233		222.888	0.534884	0.305732	0.694268	0.229151
73.9	0.0697674	0	1	0.0697674		223.205	0.534884	0.299363	0.700637	0.235521
87.95	0.0465116	0	1	0.0465116		223.75	0.534884	0.292994	0.707006	0.24189
147.9	0.0232558	0	1	0.0232558		225.265	0.534884	0.286624	0.713376	0.24826
198.2	0	0	1	0		226.817	0.534884	0.280255	0.719745	0.254629
						228.635	0.511628	0.280255	0.719745	0.231373
						231.07	0.511628	0.261146	0.738854	0.250481
						232.632	0.511628	0.254777	0.745223	0.256851
						234.062	0.488372	0.254777	0.745223	0.233595
						236.429	0.465116	0.248408	0.751592	0.216709
						240.079	0.44186	0.248408	0.751592	0.193453
						242.4	0.418605	0.248408	0.751592	0.170197
						242.917	0.418605	0.242038	0.757962	0.176566
						244.667	0.418605	0.229299	0.770701	0.189305
						248	0.395349	0.229299	0.770701	0.166049
						250.625	0.372093	0.22293	0.77707	0.149163
						251.875	0.372093	0.216561	0.783439	0.155533
						254.25	0.372093	0.210191	0.789809	0.161902
						256.75	0.348837	0.203822	0.796178	0.145016
						257.75	0.348837	0.197452	0.802548	0.151385
						260.25	0.348837	0.191083	0.808917	0.157754
						263.05	0.348837	0.184713	0.815287	0.164124
						267.5	0.348837	0.178344	0.821656	0.170493
						272.064	0.325581	0.178344	0.821656	0.147237
						275.114	0.325581	0.171975	0.828025	0.153607
						277.639	0.325581	0.165605	0.834395	0.159976
						277.988	0.325581	0.159236	0.840764	0.166346
						278.683	0.302326	0.159236	0.840764	0.14309
						281.25	0.302326	0.152866	0.847134	0.149459
						283.542	0.302326	0.146497	0.853503	0.155829
						286.542	0.302326	0.140127	0.859873	0.162198
						289.667	0.27907	0.140127	0.859873	0.138942
						295.556	0.27907	0.133758	0.866242	0.145312
						304.127	0.27907	0.127389	0.872611	0.151681
						307.321	0.255814	0.127389	0.872611	0.128425
						312.639	0.255814	0.121019	0.878981	0.134795
						320.389	0.255814	0.11465	0.88535	0.141164
						325.786	0.232558	0.11465	0.88535	0.117908
						330.119	0.232558	0.10828	0.89172	0.124278
						332.5	0.209302	0.10828	0.89172	0.101022
						337.167	0.186047	0.10828	0.89172	0.0777663
						342.5	0.186047	0.101911	0.898089	0.0841357
						344.5	0.186047	0.0955414	0.904459	0.0905051
						347.5	0.162791	0.0955414	0.904459	0.0672493
						352.5	0.139535	0.0955414	0.904459	0.0439935
						356.591	0.116279	0.0955414	0.904459	0.0207377
						358.535	0.116279	0.089172	0.910828	0.0271071
						364.444	0.116279	0.0828025	0.917197	0.0334765
						370.555	0.116279	0.0764331	0.923567	0.0398459
						378.555	0.0930233	0.0764331	0.923567	0.0165901
						386.333	0.0930233	0.0700637	0.929936	0.0229596
						396.433	0.0930233	0.0636943	0.936306	0.029329
						414.1	0.0930233	0.0573248	0.942675	0.0356984
						424.333	0.0930233	0.0509554	0.949045	0.0420678
						430	0.0697674	0.044586	0.955414	0.0251815
						440.416	0.0465116	0.044586	0.955414	0.00192564
						450.892	0.0232558	0.044586	0.955414	-0.0213302
						478.392	0.0232558	0.0382166	0.961783	-0.0149607
						502.917	0.0232558	0.0318471	0.968153	-0.00859132
						517.917	0.0232558	0.0254777	0.974522	-0.00222189
						537.917	0.0232558	0.0191083	0.980892	0.00414753
						621.667	0.0232558	0.0127389	0.987261	0.010517
						760	0.0232558	0.00636943	0.993631	0.0168864
						835	0	0.00636943	0.993631	-0.00636943
						851	0	0	1	0
