# Supplementary material for: Significance of the inflammatory-immune-nutritional (IINS) score on postoperative survival and recurrence in breast cancer patients: a retrospective study
Source: PeerJ. 2025 Aug 22;13:e19950. doi: 10.7717/peerj.19950 (PMC12377354; doi:10.7717/peerj.19950)
Supplement: Supplemental Information 6 [file peerj-13-19950-s006.xlsx]

## Sheet: Sheet1
Coordinates of the curve						Coordinates of the curve						Coordinates of the curve
Test Outcome Variable.	IINS					Test Outcome Variable.	PLR					Test Outcome Variable.	PNI
is positive when it is greater than or equal to this valuea	sensitivity	1 - Specificity	idiosyncrasy	Jordon index (math.)	0.389294	is positive when it is greater than or equal to this valuea	sensitivity	1 - Specificity	idiosyncrasy	Jordon index (math.)	0.440925	is positive when it is greater than or equal to this valuea	sensitivity	1 - Specificity	idiosyncrasy	Jordon index (math.)	0.301552
29.9	1	1	0	0	48.75	45.6667	1	1	0	0	159.525	31.2	1	1	0	0	45.15
33.4	1	0.99187	0.00813008	0.00813008		48	1	0.99187	0.00813008	0.00813008		32.25	1	0.987013	0.012987	0.012987
36.45	0.987013	0.99187	0.00813008	-0.00485693		50.5	1	0.98374	0.0162602	0.0162602		32.65	0.99187	0.987013	0.012987	0.00485693
37.4	0.974026	0.99187	0.00813008	-0.0178439		52.0833	1	0.97561	0.0243902	0.0243902		33.4	0.99187	0.974026	0.025974	0.0178439
38.15	0.974026	0.98374	0.0162602	-0.00971386		54.1912	1	0.96748	0.0325203	0.0325203		34.5	0.99187	0.961039	0.038961	0.030831
38.6	0.974026	0.97561	0.0243902	-0.00158378		59.7593	1	0.95935	0.0406504	0.0406504		35.55	0.98374	0.961039	0.038961	0.0227009
38.85	0.974026	0.96748	0.0325203	0.0065463		64.7727	1	0.95122	0.0487805	0.0487805		36	0.98374	0.948052	0.0519481	0.0356879
39.2	0.961039	0.96748	0.0325203	-0.00644071		67.0045	1	0.943089	0.0569106	0.0569106		36.6	0.98374	0.935065	0.0649351	0.0486749
39.75	0.961039	0.95935	0.0406504	0.00168937		69.05	1	0.934959	0.0650407	0.0650407		37.35	0.98374	0.922078	0.0779221	0.0616619
40.15	0.948052	0.95935	0.0406504	-0.0112976		70.208	1	0.926829	0.0731707	0.0731707		37.85	0.98374	0.896104	0.103896	0.0876359
40.3	0.948052	0.95122	0.0487805	-0.00316756		70.7962	1	0.918699	0.0813008	0.0813008		38.4	0.98374	0.87013	0.12987	0.11361
40.45	0.948052	0.943089	0.0569106	0.00496252		72.0587	1	0.910569	0.0894309	0.0894309		38.8	0.98374	0.857143	0.142857	0.126597
40.6	0.948052	0.934959	0.0650407	0.0130926		73.5538	1	0.902439	0.097561	0.097561		39.1	0.97561	0.844156	0.155844	0.131454
40.8	0.935065	0.934959	0.0650407	0.000105585		74.5833	1	0.894309	0.105691	0.105691		39.35	0.97561	0.831169	0.168831	0.144441
40.95	0.935065	0.926829	0.0731707	0.00823567		75.45	1	0.886179	0.113821	0.113821		39.45	0.97561	0.818182	0.181818	0.157428
41.1	0.935065	0.894309	0.105691	0.040756		76.398	1	0.878049	0.121951	0.121951		39.55	0.97561	0.805195	0.194805	0.170415
41.25	0.935065	0.886179	0.113821	0.0488861		76.9095	1	0.869919	0.130081	0.130081		39.75	0.97561	0.792208	0.207792	0.183402
41.35	0.935065	0.878049	0.121951	0.0570162		77.35	1	0.861789	0.138211	0.138211		39.95	0.97561	0.779221	0.220779	0.196389
41.45	0.935065	0.869919	0.130081	0.0651462		77.8171	1	0.853659	0.146341	0.146341		40.2	0.97561	0.766234	0.233766	0.209376
41.55	0.935065	0.853659	0.146341	0.0814064		79.1136	1	0.845528	0.154472	0.154472		40.7	0.96748	0.753247	0.246753	0.214233
41.65	0.935065	0.837398	0.162602	0.0976666		80.5695	1	0.837398	0.162602	0.162602		41.1	0.95935	0.753247	0.246753	0.206103
41.75	0.935065	0.829268	0.170732	0.105797		81.8655	0.987013	0.837398	0.162602	0.149615		41.25	0.95935	0.74026	0.25974	0.21909
41.9	0.935065	0.821138	0.178862	0.113927		83.2115	0.987013	0.829268	0.170732	0.157745		41.35	0.95122	0.727273	0.272727	0.223947
42.05	0.922078	0.804878	0.195122	0.1172		83.6055	0.987013	0.821138	0.178862	0.165875		41.55	0.943089	0.727273	0.272727	0.215817
42.15	0.922078	0.788618	0.211382	0.13346		85.822	0.987013	0.813008	0.186992	0.174005		41.75	0.926829	0.727273	0.272727	0.199557
42.25	0.922078	0.772358	0.227642	0.14972		88.2327	0.987013	0.804878	0.195122	0.182135		42.1	0.918699	0.727273	0.272727	0.191426
42.45	0.922078	0.764228	0.235772	0.15785		90.1948	0.987013	0.796748	0.203252	0.190265		42.45	0.910569	0.727273	0.272727	0.183296
42.65	0.922078	0.747967	0.252033	0.17411		91.8591	0.987013	0.788618	0.211382	0.198395		42.65	0.910569	0.714286	0.285714	0.196283
42.75	0.909091	0.747967	0.252033	0.161123		92.0025	0.987013	0.780488	0.219512	0.206525		42.85	0.894309	0.688312	0.311688	0.205997
42.9	0.909091	0.723577	0.276423	0.185514		92.615	0.987013	0.772358	0.227642	0.214655		42.95	0.894309	0.675325	0.324675	0.218984
43.05	0.896104	0.699187	0.300813	0.196917		93.229	0.987013	0.764228	0.235772	0.222785		43.05	0.886179	0.649351	0.350649	0.236828
43.15	0.896104	0.691057	0.308943	0.205047		93.5415	0.974026	0.764228	0.235772	0.209798		43.15	0.878049	0.649351	0.350649	0.228698
43.25	0.896104	0.666667	0.333333	0.229437		93.7981	0.974026	0.756098	0.243902	0.217928		43.25	0.861789	0.636364	0.363636	0.225425
43.35	0.896104	0.650407	0.349593	0.245697		93.9231	0.974026	0.747967	0.252033	0.226058		43.35	0.853659	0.623377	0.376623	0.230282
43.45	0.896104	0.642276	0.357724	0.253827		94.0833	0.974026	0.739837	0.260163	0.234189		43.45	0.845528	0.623377	0.376623	0.222152
43.6	0.896104	0.634146	0.365854	0.261958		94.1833	0.974026	0.731707	0.268293	0.242319		43.55	0.845528	0.61039	0.38961	0.235139
43.75	0.896104	0.626016	0.373984	0.270088		94.8273	0.974026	0.723577	0.276423	0.250449		43.8	0.837398	0.597403	0.402597	0.239996
43.85	0.87013	0.626016	0.373984	0.244114		95.4772	0.974026	0.715447	0.284553	0.258579		44.05	0.829268	0.597403	0.402597	0.231866
43.95	0.87013	0.617886	0.382114	0.252244		96.083	0.974026	0.707317	0.292683	0.266709		44.15	0.829268	0.571429	0.428571	0.25784
44.1	0.87013	0.609756	0.390244	0.260374		98.333	0.974026	0.699187	0.300813	0.274839		44.25	0.829268	0.558442	0.441558	0.270827
44.25	0.87013	0.593496	0.406504	0.276634		100.588	0.948052	0.699187	0.300813	0.248865		44.35	0.821138	0.558442	0.441558	0.262697
44.35	0.87013	0.569106	0.430894	0.301024		101.255	0.948052	0.691057	0.308943	0.256995		44.5	0.821138	0.545455	0.454545	0.275684
44.5	0.857143	0.552846	0.447154	0.304297		102	0.948052	0.682927	0.317073	0.265125		44.65	0.796748	0.532468	0.467532	0.26428
44.7	0.857143	0.544715	0.455285	0.312427		103	0.935065	0.682927	0.317073	0.252138		44.8	0.796748	0.519481	0.480519	0.277267
44.85	0.844156	0.528455	0.471545	0.315701		104.583	0.935065	0.674797	0.325203	0.260268		44.95	0.788618	0.493506	0.506494	0.295111
45	0.831169	0.528455	0.471545	0.302714		107.083	0.935065	0.666667	0.333333	0.268398		45.05	0.756098	0.480519	0.519481	0.275578
45.15	0.831169	0.520325	0.479675	0.310844		108.541	0.935065	0.658537	0.341463	0.276528		45.15	0.756098	0.454545	0.545455	0.301552
45.25	0.831169	0.512195	0.487805	0.318974		109.643	0.935065	0.650407	0.349593	0.284658		45.25	0.739837	0.454545	0.545455	0.285292
45.35	0.831169	0.504065	0.495935	0.327104		110.625	0.935065	0.642276	0.357724	0.292789		45.35	0.723577	0.454545	0.545455	0.269032
45.45	0.831169	0.479675	0.520325	0.351494		111.511	0.935065	0.634146	0.365854	0.300919		45.45	0.715447	0.441558	0.558442	0.273889
45.55	0.792208	0.479675	0.520325	0.312533		112.329	0.935065	0.626016	0.373984	0.309049		45.55	0.707317	0.428571	0.571429	0.278746
45.65	0.792208	0.471545	0.528455	0.320663		113.426	0.935065	0.617886	0.382114	0.317179		45.65	0.699187	0.402597	0.597403	0.29659
45.75	0.792208	0.455285	0.544715	0.336923		114.942	0.935065	0.609756	0.390244	0.325309		45.75	0.691057	0.402597	0.597403	0.28846
45.9	0.779221	0.439024	0.560976	0.340196		116.025	0.935065	0.601626	0.398374	0.333439		45.85	0.682927	0.38961	0.61039	0.293316
46.05	0.766234	0.422764	0.577236	0.34347		116.944	0.935065	0.593496	0.406504	0.341569		46	0.674797	0.376623	0.623377	0.298173
46.15	0.753247	0.406504	0.593496	0.346743		117.524	0.935065	0.585366	0.414634	0.349699		46.15	0.666667	0.376623	0.623377	0.290043
46.3	0.753247	0.398374	0.601626	0.354873		119.439	0.922078	0.585366	0.414634	0.336712		46.25	0.658537	0.363636	0.636364	0.2949
46.45	0.74026	0.398374	0.601626	0.341886		121.476	0.909091	0.585366	0.414634	0.323725		46.35	0.650407	0.350649	0.649351	0.299757
46.6	0.74026	0.390244	0.609756	0.350016		123.45	0.909091	0.577236	0.422764	0.331855		46.45	0.617886	0.337662	0.662338	0.280224
46.8	0.74026	0.382114	0.617886	0.358146		126.35	0.909091	0.569106	0.430894	0.339985		46.55	0.617886	0.324675	0.675325	0.293211
46.95	0.727273	0.382114	0.617886	0.345159		127.797	0.909091	0.560976	0.439024	0.348115		46.65	0.593496	0.324675	0.675325	0.268821
47.05	0.714286	0.373984	0.626016	0.340302		128.158	0.909091	0.552846	0.447154	0.356245		46.75	0.569106	0.324675	0.675325	0.24443
47.15	0.688312	0.365854	0.634146	0.322458		128.756	0.896104	0.552846	0.447154	0.343258		46.85	0.552846	0.311688	0.688312	0.241157
47.25	0.675325	0.357724	0.642276	0.317601		130.072	0.896104	0.544715	0.455285	0.351388		47.1	0.544715	0.311688	0.688312	0.233027
47.4	0.662338	0.357724	0.642276	0.304614		132.193	0.896104	0.536585	0.463415	0.359519		47.35	0.544715	0.298701	0.701299	0.246014
47.55	0.662338	0.349593	0.650407	0.312744		133.567	0.883117	0.536585	0.463415	0.346532		47.45	0.536585	0.298701	0.701299	0.237884
47.65	0.662338	0.341463	0.658537	0.320874		133.857	0.883117	0.528455	0.471545	0.354662		47.6	0.520325	0.298701	0.701299	0.221624
47.75	0.636364	0.333333	0.666667	0.30303		134.229	0.87013	0.528455	0.471545	0.341675		47.8	0.520325	0.272727	0.727273	0.247598
47.85	0.636364	0.317073	0.682927	0.31929		136.39	0.87013	0.520325	0.479675	0.349805		47.95	0.512195	0.272727	0.727273	0.239468
47.95	0.636364	0.292683	0.707317	0.343681		138.318	0.857143	0.520325	0.479675	0.336818		48.1	0.495935	0.25974	0.74026	0.236195
48.05	0.636364	0.276423	0.723577	0.359941		139.2	0.857143	0.512195	0.487805	0.344948		48.25	0.479675	0.25974	0.74026	0.219935
48.15	0.636364	0.268293	0.731707	0.368071		140.909	0.844156	0.495935	0.504065	0.348221		48.35	0.471545	0.246753	0.753247	0.224791
48.25	0.636364	0.260163	0.739837	0.376201		144.409	0.844156	0.487805	0.512195	0.356351		48.5	0.447154	0.246753	0.753247	0.200401
48.35	0.636364	0.252033	0.747967	0.384331		147.786	0.844156	0.479675	0.520325	0.364481		48.65	0.447154	0.233766	0.766234	0.213388
48.45	0.623377	0.235772	0.764228	0.387604		148.619	0.844156	0.471545	0.528455	0.372611		48.8	0.439024	0.207792	0.792208	0.231232
48.55	0.61039	0.227642	0.772358	0.382747		150.896	0.844156	0.463415	0.536585	0.380741		49	0.422764	0.207792	0.792208	0.214972
48.65	0.597403	0.219512	0.780488	0.37789		153.915	0.844156	0.455285	0.544715	0.388871		49.2	0.414634	0.194805	0.805195	0.219829
48.75	0.584416	0.195122	0.804878	0.389294		154.732	0.831169	0.455285	0.544715	0.375884		49.35	0.406504	0.181818	0.818182	0.224686
48.85	0.571429	0.186992	0.813008	0.384437		155.158	0.831169	0.447154	0.552846	0.384014		49.5	0.390244	0.181818	0.818182	0.208426
49.1	0.545455	0.186992	0.813008	0.358463		155.96	0.831169	0.439024	0.560976	0.392144		49.65	0.382114	0.181818	0.818182	0.200296
49.4	0.545455	0.178862	0.821138	0.366593		156.682	0.831169	0.430894	0.569106	0.400275		49.75	0.341463	0.168831	0.831169	0.172632
49.55	0.545455	0.170732	0.829268	0.374723		157.071	0.831169	0.422764	0.577236	0.408405		49.85	0.341463	0.155844	0.844156	0.185619
49.65	0.519481	0.162602	0.837398	0.356879		157.221	0.831169	0.414634	0.585366	0.416535		49.95	0.325203	0.155844	0.844156	0.169359
49.75	0.493506	0.162602	0.837398	0.330905		157.881	0.831169	0.398374	0.601626	0.432795		50.05	0.317073	0.155844	0.844156	0.161229
49.85	0.480519	0.162602	0.837398	0.317918		159.525	0.831169	0.390244	0.609756	0.440925		50.15	0.300813	0.142857	0.857143	0.157956
49.95	0.454545	0.162602	0.837398	0.291944		161.627	0.818182	0.390244	0.609756	0.427938		50.25	0.292683	0.142857	0.857143	0.149826
50.15	0.441558	0.162602	0.837398	0.278957		163.476	0.818182	0.382114	0.617886	0.436068		50.35	0.268293	0.142857	0.857143	0.125436
50.35	0.441558	0.146341	0.853659	0.295217		165.219	0.792208	0.382114	0.617886	0.410094		50.45	0.260163	0.12987	0.87013	0.130292
50.55	0.428571	0.138211	0.861789	0.29036		166.327	0.792208	0.373984	0.626016	0.418224		50.55	0.252033	0.12987	0.87013	0.122162
50.75	0.428571	0.130081	0.869919	0.29849		166.583	0.779221	0.373984	0.626016	0.405237		50.65	0.243902	0.12987	0.87013	0.114032
50.85	0.415584	0.130081	0.869919	0.285503		166.944	0.766234	0.365854	0.634146	0.40038		50.85	0.243902	0.116883	0.883117	0.127019
50.95	0.415584	0.121951	0.878049	0.293633		168.056	0.766234	0.357724	0.642276	0.40851		51.25	0.243902	0.103896	0.896104	0.140006
51.05	0.38961	0.121951	0.878049	0.267659		169.087	0.766234	0.349593	0.650407	0.41664		51.55	0.235772	0.0779221	0.922078	0.15785
51.2	0.363636	0.097561	0.902439	0.266075		169.976	0.753247	0.349593	0.650407	0.403653		51.75	0.227642	0.0649351	0.935065	0.162707
51.35	0.363636	0.0894309	0.910569	0.274205		171.333	0.74026	0.349593	0.650407	0.390666		52.05	0.219512	0.0649351	0.935065	0.154577
51.45	0.337662	0.0894309	0.910569	0.248231		172.667	0.727273	0.349593	0.650407	0.377679		52.25	0.211382	0.0649351	0.935065	0.146447
51.55	0.337662	0.0813008	0.918699	0.256362		173.939	0.727273	0.341463	0.658537	0.385809		52.35	0.195122	0.0649351	0.935065	0.130187
51.65	0.337662	0.0731707	0.926829	0.264492		175.773	0.727273	0.333333	0.666667	0.393939		52.45	0.186992	0.0519481	0.948052	0.135044
51.95	0.324675	0.0650407	0.934959	0.259635		177.429	0.727273	0.325203	0.674797	0.402069		52.55	0.178862	0.038961	0.961039	0.139901
52.25	0.311688	0.0650407	0.934959	0.246648		178.929	0.714286	0.325203	0.674797	0.389082		52.65	0.170732	0.025974	0.974026	0.144758
52.35	0.298701	0.0650407	0.934959	0.233661		181.765	0.701299	0.325203	0.674797	0.376095		52.8	0.162602	0.025974	0.974026	0.136628
52.7	0.298701	0.0569106	0.943089	0.241791		183.64	0.688312	0.325203	0.674797	0.363108		52.95	0.146341	0.012987	0.987013	0.133354
53.15	0.298701	0.0487805	0.95122	0.249921		184.148	0.675325	0.325203	0.674797	0.350121		53.25	0.130081	0.012987	0.987013	0.117094
53.4	0.285714	0.0487805	0.95122	0.236934		185.13	0.662338	0.325203	0.674797	0.337134		53.65	0.121951	0.012987	0.987013	0.108964
53.55	0.285714	0.0406504	0.95935	0.245064		186.057	0.649351	0.325203	0.674797	0.324147		53.85	0.113821	0.012987	0.987013	0.100834
53.65	0.25974	0.0406504	0.95935	0.21909		186.533	0.649351	0.317073	0.682927	0.332277		54	0.105691	0.012987	0.987013	0.092704
53.75	0.246753	0.0406504	0.95935	0.206103		186.795	0.636364	0.317073	0.682927	0.31929		54.15	0.097561	0.012987	0.987013	0.084574
53.85	0.233766	0.0406504	0.95935	0.193116		187.39	0.636364	0.308943	0.691057	0.327421		54.25	0.0894309	0.012987	0.987013	0.0764439
54	0.220779	0.0406504	0.95935	0.180129		188.214	0.636364	0.300813	0.699187	0.335551		54.35	0.0813008	0.012987	0.987013	0.0683138
54.2	0.207792	0.0406504	0.95935	0.167142		190.286	0.636364	0.292683	0.707317	0.343681		54.6	0.0731707	0.012987	0.987013	0.0601837
54.45	0.194805	0.0325203	0.96748	0.162285		194.462	0.623377	0.292683	0.707317	0.330694		55.15	0.0569106	0.012987	0.987013	0.0439236
54.65	0.181818	0.0243902	0.97561	0.157428		198.462	0.623377	0.284553	0.715447	0.338824		55.65	0.0406504	0.012987	0.987013	0.0276634
54.85	0.181818	0.0162602	0.98374	0.165558		200.6	0.623377	0.276423	0.723577	0.346954		55.85	0.0406504	0	1	0.0406504
55.35	0.168831	0.0162602	0.98374	0.152571		202.908	0.623377	0.268293	0.731707	0.355084		56.15	0.0325203	0	1	0.0325203
55.8	0.155844	0.0162602	0.98374	0.139584		204.974	0.623377	0.260163	0.739837	0.363214		56.8	0.0243902	0	1	0.0243902
56.1	0.142857	0.00813008	0.99187	0.134727		205.394	0.61039	0.260163	0.739837	0.350227		57.5	0.0162602	0	1	0.0162602
56.45	0.12987	0.00813008	0.99187	0.12174		205.909	0.61039	0.252033	0.747967	0.358357		58.35	0.00813008	0	1	0.00813008
56.75	0.116883	0.00813008	0.99187	0.108753		207.182	0.61039	0.243902	0.756098	0.366487		59.9	0	0	1	0
57.3	0.103896	0.00813008	0.99187	0.095766		209.5	0.597403	0.243902	0.756098	0.3535
58.2	0.0909091	0.00813008	0.99187	0.082779		213.5	0.584416	0.243902	0.756098	0.340513
59.2	0.0779221	0.00813008	0.99187	0.069792		217.091	0.584416	0.235772	0.764228	0.348643
60.85	0.0649351	0.00813008	0.99187	0.056805		220.202	0.571429	0.235772	0.764228	0.335656
62.55	0.0519481	0.00813008	0.99187	0.043818		222.461	0.558442	0.235772	0.764228	0.322669
66.8	0.0519481	0	1	0.0519481		222.888	0.545455	0.235772	0.764228	0.309682
73.9	0.038961	0	1	0.038961		223.205	0.532468	0.235772	0.764228	0.296695
87.95	0.025974	0	1	0.025974		223.75	0.519481	0.235772	0.764228	0.283708
147.9	0.012987	0	1	0.012987		225.265	0.506494	0.235772	0.764228	0.270721
198.2	0	0	1	0		226.817	0.493506	0.235772	0.764228	0.257734
						228.635	0.480519	0.235772	0.764228	0.244747
						231.07	0.467532	0.219512	0.780488	0.24802
						232.632	0.467532	0.211382	0.788618	0.25615
						234.062	0.454545	0.211382	0.788618	0.243163
						236.429	0.428571	0.211382	0.788618	0.217189
						240.079	0.415584	0.211382	0.788618	0.204202
						242.4	0.402597	0.211382	0.788618	0.191215
						242.917	0.402597	0.203252	0.796748	0.199345
						244.667	0.38961	0.195122	0.804878	0.194488
						248	0.38961	0.186992	0.813008	0.202619
						250.625	0.376623	0.178862	0.821138	0.197762
						251.875	0.376623	0.170732	0.829268	0.205892
						254.25	0.363636	0.170732	0.829268	0.192905
						256.75	0.337662	0.170732	0.829268	0.166931
						257.75	0.337662	0.162602	0.837398	0.175061
						260.25	0.324675	0.162602	0.837398	0.162074
						263.05	0.311688	0.162602	0.837398	0.149087
						267.5	0.311688	0.154472	0.845528	0.157217
						272.064	0.298701	0.154472	0.845528	0.14423
						275.114	0.285714	0.154472	0.845528	0.131243
						277.639	0.272727	0.154472	0.845528	0.118256
						277.988	0.25974	0.154472	0.845528	0.105269
						278.683	0.246753	0.154472	0.845528	0.0922817
						281.25	0.233766	0.154472	0.845528	0.0792947
						283.542	0.233766	0.146341	0.853659	0.0874248
						286.542	0.233766	0.138211	0.861789	0.0955549
						289.667	0.220779	0.138211	0.861789	0.0825678
						295.556	0.220779	0.130081	0.869919	0.0906979
						304.127	0.207792	0.130081	0.869919	0.0777109
						307.321	0.194805	0.130081	0.869919	0.0647239
						312.639	0.181818	0.130081	0.869919	0.0517369
						320.389	0.168831	0.130081	0.869919	0.0387499
						325.786	0.155844	0.130081	0.869919	0.0257629
						330.119	0.155844	0.121951	0.878049	0.0338929
						332.5	0.155844	0.113821	0.886179	0.042023
						337.167	0.142857	0.113821	0.886179	0.029036
						342.5	0.12987	0.113821	0.886179	0.016049
						344.5	0.12987	0.105691	0.894309	0.0241791
						347.5	0.12987	0.097561	0.902439	0.0323092
						352.5	0.116883	0.097561	0.902439	0.0193221
						356.591	0.103896	0.097561	0.902439	0.00633513
						358.535	0.0909091	0.097561	0.902439	-0.00665188
						364.444	0.0779221	0.097561	0.902439	-0.0196389
						370.555	0.0649351	0.097561	0.902439	-0.0326259
						378.555	0.0649351	0.0894309	0.910569	-0.0244958
						386.333	0.0649351	0.0813008	0.918699	-0.0163657
						396.433	0.0649351	0.0731707	0.926829	-0.00823567
						414.1	0.0519481	0.0731707	0.926829	-0.0212227
						424.333	0.0519481	0.0650407	0.934959	-0.0130926
						430	0.0519481	0.0487805	0.95122	0.00316756
						440.416	0.038961	0.0487805	0.95122	-0.00981945
						450.892	0.038961	0.0406504	0.95935	-0.00168937
						478.392	0.025974	0.0406504	0.95935	-0.0146764
						502.917	0.025974	0.0325203	0.96748	-0.0065463
						517.917	0.025974	0.0243902	0.97561	0.00158378
						537.917	0.012987	0.0243902	0.97561	-0.0114032
						621.667	0.012987	0.0162602	0.98374	-0.00327315
						760	0.012987	0.00813008	0.99187	0.00485693
						835	0	0.00813008	0.99187	-0.00813008
						851	0	0	1	0
