# Supplementary material for: Significance of the inflammatory-immune-nutritional (IINS) score on postoperative survival and recurrence in breast cancer patients: a retrospective study
Source: PeerJ. 2025 Aug 22;13:e19950. doi: 10.7717/peerj.19950 (PMC12377354; doi:10.7717/peerj.19950)
Supplement: Supplemental Information 7 [file peerj-13-19950-s007.xlsx]

## Sheet: Sheet1
AGE	BMI	axillary lymph nodes	tumer size	CRP	Lym	ALB	blood platelet	IINS	IINS score	PLR	PNI	ER	PR	HER-2	PFS	OS	TNM	BMI group	Axillary Lymph Node Classification	Tumour size classification	PFS time	OS time	CRP	Lym truncation value	ALB truncated value	Treatment
64	21.7	1	2	3	1.1	39.8	154	43.9	2	140	45.3	1	2	1	0	0	1	2	2	1	45	45	0	2	0	1
53	26.1	1	4	3	1.3	37.8	166	42.1	2	127.7	44.3	1	1	1	0	0	3	3	2	2	44	44	0	1	1	1
49	20.2	0	1	3	1.6	43.5	174	48.1	1	108.8	51.5	1	1	1	0	0	2	2	1	1	42	42	0	1	0	1
56	18.5	0	1	2	1.9	38.7	167	42.6	0	87.9	48.2	2	2	1	0	0	2	1	1	1	40	40	0	0	0	1
59	27.8	1	3.1	14	1.5	30.6	434	46.1	5	289.3	38.1	1	1	1	1	1	2	3	2	2	12	18	2	1	2	3
54	22.3	1	1.5	4	1.9	35.8	175	41.7	1	92.1	45.3	1	1	1	0	0	2	2	2	1	42	42	0	0	1	1
46	23.4	4	1.8	9	1.5	36.6	150	47.1	3	100	44.1	2	2	2	1	0	3	2	3	1	12	46	1	1	1	1
59	24.5	0	1.8	1	2.9	40.3	223	44.2	0	76.9	54.8	1	1	1	0	0	1	3	1	1	42	42	0	0	0	2
34	24.8	0	2	2	2.4	41	178	45.4	0	74.2	53	2	2	1	0	0	1	3	1	1	55	55	0	0	0	2
63	24.7	2	2.5	2	2.1	39.6	217	43.7	0	80.4	50.1	1	1	1	0	0	2	3	2	2	60	60	0	0	0	2
60	31.6	0	1.3	2	2.6	39.7	177	44.3	0	68.1	52.7	1	1	1	0	0	1	3	1	1	62	62	0	0	0	1
41	27.1	0	2	1	2.6	36.9	217	40.5	1	83.5	49.9	2	2	1	0	0	1	3	1	1	60	60	0	0	1	1
54	22.4	0	1	2	2.1	38.9	193	43	0	91.9	49.4	1	2	1	0	0	1	2	1	1	55	55	0	0	0	1
62	26.6	0	1	5	0.6	32.2	199	37.8	4	331.7	35.2	2	2	1	0	1	1	3	1	1	44	14	0	2	2	2
75	22.6	0	3	4	1.3	30.6	315	35.9	3	242.3	37.1	2	2	1	1	1	1	2	1	2	9	15	0	1	2	2
47	26.2	0	3	3	1.7	44	173	48.7	0	157.3	52.5	1	1	1	0	0	1	3	1	2	52	52	0	0	0	3
37	21.8	0	1.5	8	0.6	42.5	222	51.1	3	370	45.5	2	2	1	1	0	1	2	1	1	36	36	1	2	0	1
58	30.3	0	4	2	0.4	43	201	45.4	2	502.5	45	2	2	2	0	0	2	3	1	2	52	52	0	2	0	2
62	22.9	1	1	1	1.1	38.1	226	40.2	3	205.5	43.6	2	2	2	0	0	2	2	2	1	56	56	0	2	1	1
49	23.9	5	2.5	6	0.3	30.7	100	37	4	333.3	32.2	2	2	2	1	1	2	3	3	2	15	18	0	2	2	2
62	24.7	2	1	2	1.5	41.6	175	45.1	1	116.7	49.1	1	1	2	0	0	2	3	2	1	54	54	0	1	0	1
66	23.7	1	1.5	2	0.8	38.8	206	41.6	2	257.5	42.8	2	2	1	0	0	2	2	2	1	55	55	0	2	0	3
52	27	1	1	2	0.2	39.4	170	41.6	2	850	40.4	2	2	2	0	0	2	3	2	1	51	51	0	2	0	1
43	24.7	0	3	1	1.7	38.2	121	40.9	1	71.2	46.7	1	1	1	0	0	2	3	1	2	55	55	0	0	1	1
67	25	0	2	2	0.5	38.5	115	41	2	230	41	1	1	1	0	0	2	3	1	1	57	57	0	2	0	2
44	23.4	0	1.5	1	1.2	46.3	113	48.5	1	94.2	52.3	1	1	1	0	0	2	2	1	1	57	57	0	1	0	3
43	20.5	0	1.5	2	0.6	40.2	120	42.8	2	200	43.2	1	2	2	0	0	1	2	1	1	55	55	0	2	0	2
50	18.3	0	2	1	1	45	177	47	2	177	50	1	1	2	0	0	1	1	1	1	57	57	0	2	0	1
62	23	3	1	15	1	36.3	235	52.3	5	235	41.3	2	2	1	1	1	2	2	2	1	29	32	2	2	1	1
57	21.9	0	2.5	2	0.6	45.2	256	47.8	2	426.7	48.2	2	2	1	0	0	2	2	1	2	62	62	0	2	0	2
61	25	0	2.5	3	1.9	46	210	50.9	0	110.5	55.5	1	1	1	0	0	2	3	1	2	58	58	0	0	0	2
68	24.5	4	2	15	1.6	42.1	294	58.7	3	183.8	50.1	1	2	1	1	1	3	3	3	1	24	26	2	1	0	1
54	21.9	9	3.5	8	1.5	36.9	258	46	3	172	44.4	1	2	1	1	0	3	2	3	2	29	36	1	1	1	3
64	27.3	0	2.2	2	2.4	37.7	169	42.1	1	70.4	49.7	1	1	1	0	0	2	3	1	2	48	48	0	0	1	1
58	28.1	3	2	35	1.7	40.6	312	77.3	2	183.5	49.1	2	2	1	1	1	3	3	2	1	20	25	2	0	0	3
59	36.9	1	3	6	1.7	37.1	273	44.8	1	160.6	45.6	1	1	1	1	0	3	3	2	2	32	43	0	0	1	1
44	23.8	0	1	1	0.9	40.7	140	42.6	2	155.6	45.2	1	1	1	0	0	1	2	1	1	44	44	0	2	0	3
56	25.8	0	2.5	8	1.1	39.4	300	48.5	3	272.7	44.9	1	2	1	1	0	3	3	1	2	12	44	1	2	0	3
48	20.6	0	0.6	1	1.1	39.4	192	41.5	2	174.5	44.9	1	1	1	0	0	1	2	1	1	46	46	0	2	0	3
62	23.2	1	3	3	1.4	42.7	208	47.1	1	148.6	49.7	2	2	1	0	0	3	2	2	2	44	44	0	1	0	3
63	24.9	0	1.3	3	1.1	40.2	173	44.3	2	157.3	45.7	2	2	1	0	0	1	3	1	1	47	47	0	2	0	3
62	18.1	1	4	12	1.3	31.1	290	44.4	4	223.1	37.6	2	2	1	1	0	1	1	2	2	9	47	1	1	2	1
70	25.1	1	2.2	2	1.1	37.3	290	40.4	3	263.6	42.8	1	1	1	0	0	2	3	2	2	43	43	0	2	1	2
50	27.1	0	2	3	1.7	38.1	129	42.8	1	75.9	46.6	1	1	1	0	0	2	3	1	1	42	42	0	0	1	3
53	29	0	2.3	2	1.5	35.9	145	39.4	2	96.7	43.4	2	2	1	0	0	2	3	1	2	47	47	0	1	1	2
72	26.3	13	2	12	2	33.3	333	47.3	3	166.5	43.3	2	2	1	1	1	3	3	4	1	21	25	1	0	2	1
54	23.9	0	2	3	0.8	37.4	201	41.2	3	251.3	41.4	2	2	1	0	0	2	3	1	1	49	49	0	2	1	3
63	27.6	1	3.5	8	1.2	37.2	335	46.4	3	279.2	43.2	1	1	1	1	0	1	3	2	2	25	51	1	1	1	3
53	21.8	0	1.5	12	0.8	37.2	222	50	4	277.5	41.2	2	2	2	1	0	1	2	1	1	16	47	1	2	1	3
53	30.5	0	1.8	9	0.7	34.1	318	43.8	5	454.3	37.6	1	1	2	1	0	1	3	1	1	12	51	1	2	2	1
70	27.1	16	11	11	0.4	42.2	328	53.6	3	820	44.2	2	2	1	1	1	3	3	4	3	10	12	1	2	0	1
61	20.5	0	1	7	0.8	41.8	280	49.6	3	350	45.8	1	1	1	1	1	2	2	1	1	13	18	1	2	0	1
61	21.5	0	2	4	1.9	43.4	263	49.3	0	138.4	52.9	1	1	1	0	0	1	2	1	1	46	46	0	0	0	1
52	23	20	3	6	1.2	42.7	276	49.9	1	230	48.7	2	1	1	1	0	3	2	4	2	6	12	0	1	0	3
65	29	1	3	9	0.9	46	156	55.9	3	173.3	50.5	1	1	1	0	1	2	3	2	2	38	18	1	2	0	3
50	23.8	1	3	5	1.4	39.7	155	46.1	1	110.7	46.7	1	1	1	0	0	2	2	2	2	49	49	0	1	0	2
56	21.2	0	1	9	0.9	43.8	225	53.7	3	250	48.3	1	2	1	1	0	1	2	1	1	23	49	1	2	0	2
54	28.4	2	1.1	15	1	46	341	62	4	341	51	2	2	1	1	0	1	3	2	1	11	48	2	2	0	1
54	23.6	0	3	4	1.6	42.3	214	47.9	1	133.8	50.3	1	1	2	0	0	1	2	1	2	47	47	0	1	0	1
51	20.4	0	1.5	4	1.1	41.1	227	46.2	2	206.4	46.6	2	2	1	0	0	1	2	1	1	56	56	0	2	0	1
49	17.9	0	0.5	2	1.7	48.7	95	52.4	0	55.9	57.2	2	2	1	0	0	1	1	1	1	56	56	0	0	0	2
60	19.6	4	3.3	3	1.1	41.2	142	45.3	2	129.1	46.7	1	1	1	0	0	3	2	3	2	52	52	0	2	0	3
42	22.6	0	2	1	0.5	47.2	193	48.7	2	386	49.7	1	1	1	0	0	1	2	1	1	53	53	0	2	0	3
45	19.7	0	0.8	1	1	42.4	147	44.4	2	147	47.4	1	2	1	0	0	1	2	1	1	53	53	0	2	0	1
52	22.9	7	3.1	19	0.6	30	260	49.6	6	433.3	33	1	1	1	1	1	3	2	3	2	18	22	2	2	2	1
53	27.7	0	2	9	1.1	43.8	240	53.9	3	218.2	49.3	2	2	1	1	0	1	3	1	1	20	51	1	2	0	1
49	24.8	3	3.5	15	1.9	36.4	230	53.3	3	121.1	45.9	1	2	1	1	0	3	3	2	2	29	51	2	0	1	2
60	22.5	7	2.3	16	1.5	40.2	250	57.7	3	166.7	47.7	1	2	1	1	1	3	2	3	2	24	36	2	1	0	2
50	19.5	7	4	8	0.9	48	286	56.9	3	317.8	52.5	1	1	2	1	0	3	2	3	2	24	54	1	2	0	2
61	26.4	0	4	1	1.1	47.4	172	49.5	2	156.4	52.9	1	1	2	0	0	1	3	1	2	51	51	0	2	0	2
62	26.9	0	1	3	0.9	44.4	207	48.3	2	230	48.9	1	2	2	0	0	1	3	1	1	53	53	0	2	0	2
49	25.9	2	3	4	1.5	41.2	152	46.7	1	101.3	48.7	2	2	1	0	0	2	3	2	2	60	60	0	1	0	3
53	25.4	2	2.2	4	2	44.3	191	50.3	0	95.5	54.3	2	2	1	0	0	3	3	2	2	58	58	0	0	0	3
49	29.4	3	1.2	6	0.8	40.9	246	47.7	2	307.5	44.9	1	1	2	1	0	2	3	2	1	22	50	0	2	0	3
53	25.3	5	2.5	8	1	44.8	256	53.8	3	256	49.8	1	1	1	1	0	3	3	3	2	13	50	1	2	0	1
55	25.5	1	1	9	1.4	41	237	51.4	2	169.3	48	1	1	1	1	0	2	3	2	1	22	50	1	1	0	1
65	20	4	2	9	1.1	30.6	306	40.7	5	278.2	36.1	2	2	1	1	1	3	2	3	1	12	15	1	2	2	1
69	19	0	1.7	5	0.9	45.8	334	51.7	2	371.1	50.3	1	2	1	0	1	1	2	1	1	48	12	0	2	0	1
74	21.6	1	2	8	1.1	40.9	203	50.8	3	184.5	46.4	1	1	1	1	0	2	2	2	1	28	48	1	2	0	1
57	29.1	0	4	1	1	36.7	157	38.7	3	157	41.7	2	2	2	0	0	2	3	1	2	49	49	0	2	1	1
46	26.5	5	3	6	1	33.1	211	40.1	4	211	38.1	1	1	1	1	0	3	3	3	2	15	46	0	2	2	1
59	27.1	0	2	2	1.1	44.7	101	47.8	2	91.8	50.2	1	1	2	0	0	1	3	1	1	52	52	0	2	0	1
43	22	2	12	12	1.5	37.9	280	51.4	3	186.7	45.4	2	2	1	1	1	2	2	2	3	17	25	1	1	1	2
65	19.3	1	2	4	1.7	37.6	124	43.3	1	72.9	46.1	1	1	1	0	0	1	2	2	1	50	50	0	0	1	1
46	32.9	4	1.8	1	1.3	45.7	243	48	1	186.9	52.2	1	1	1	0	0	3	3	3	1	49	49	0	1	0	2
67	22.5	0	1.5	7	1.1	40.3	105	48.4	3	95.5	45.8	1	1	1	0	0	1	2	1	1	48	48	1	2	0	1
58	19.6	1	2	11	1.5	41.1	256	53.6	2	170.7	48.6	2	2	2	1	1	2	2	2	1	14	16	1	1	0	1
75	20.7	0	1	15	0.7	36.5	130	52.2	5	185.7	40	1	1	2	1	1	1	2	1	1	21	28	2	2	1	1
48	18.4	0	2	1	1.6	38.4	200	41	2	125	46.4	2	2	1	0	0	1	1	1	1	50	50	0	1	1	2
52	26.3	5	2	5	1.5	35.5	288	42	2	192	43	1	1	1	1	0	3	3	3	1	21	50	0	1	1	2
58	20.8	0	4	2	1.5	37.5	223	41	2	148.7	45	1	1	1	0	0	1	2	1	2	60	60	0	1	1	2
54	30.1	3	2	2	0.9	44.2	200	47.1	2	222.2	48.7	1	1	1	1	0	3	3	2	1	19	42	0	2	0	2
45	27.7	0	2	2	1.4	40.9	220	44.3	1	157.1	47.9	1	2	1	0	0	1	3	1	1	42	42	0	1	0	2
56	27.5	0	3	19	0.7	40	115	59.7	4	164.3	43.5	1	1	1	1	1	1	3	1	2	18	26	2	2	0	3
55	20.8	0	2.5	2	0.8	40.6	194	43.4	2	242.5	44.6	1	1	1	0	0	1	2	1	2	51	51	0	2	0	3
62	23	0	1.2	3	0.9	35.1	323	39	3	358.9	39.6	1	1	1	1	0	1	2	1	1	19	23	0	2	1	3
58	20.9	1	1.6	4	1.2	40.3	269	45.5	1	224.2	46.3	2	2	1	1	0	2	2	2	1	12	44	0	1	0	3
54	31.9	0	1.8	1	1.6	38.4	245	41	2	153.1	46.4	1	1	1	0	0	1	3	1	1	49	49	0	1	1	3
47	24	0	1	2	0.9	42	271	44.9	2	301.1	46.5	2	2	1	1	0	1	3	1	1	16	60	0	2	0	3
52	25.9	5	1	52	2.3	44.3	308	98.6	2	133.9	55.8	1	1	1	1	1	1	3	3	1	15	20	2	0	0	3
64	29.3	11	4	15	1.1	30.4	250	46.9	6	227.3	35.9	2	2	1	1	1	3	3	4	2	31	33	2	2	2	3
73	27.9	0	4	8	1.7	45	172	54.7	1	101.2	53.5	2	2	2	0	1	2	3	1	2	48	36	1	0	0	3
51	24.6	0	4	4	2.7	34.8	126	41.5	2	46.7	48.3	2	2	1	0	0	1	3	1	2	58	58	0	0	2	3
51	37.6	0	2	2	1.3	35.2	256	38.5	2	196.9	41.7	2	2	1	0	0	2	3	1	1	60	60	0	1	1	3
48	26.1	1	3.5	3	1.9	37.8	244	42.7	1	128.4	47.3	1	1	1	1	0	2	3	2	2	23	51	0	0	1	3
58	21.6	0	1	2	1.8	40.6	211	44.4	0	117.2	49.6	1	1	1	0	0	1	2	1	1	52	52	0	0	0	3
56	18.8	0	2	3	0.6	41	302	44.6	2	503.3	44	2	2	1	0	0	1	2	1	1	45	45	0	2	0	1
67	21.5	0	1	2	1.2	39	127	42.2	1	105.8	45	2	2	2	0	0	1	2	1	1	33	33	0	1	0	2
62	19.2	4	2.5	25	1.5	44	200	70.5	3	133.3	51.5	1	1	2	1	1	2	2	3	2	22	24	2	1	0	2
69	22.2	0	4	9	0.8	38.4	358	48.2	4	447.5	42.4	1	1	1	0	1	2	2	1	2	47	16	1	2	1	2
53	21.2	0	2.6	3	1.3	47.3	266	51.6	1	204.6	53.8	1	1	1	0	0	3	2	1	2	35	35	0	1	0	2
47	23.8	7	2.5	2	0.4	43.1	213	45.5	2	532.5	45.1	2	2	1	1	0	3	2	3	2	13	42	0	2	0	2
57	23.3	9	3.5	2	1.4	42.4	109	45.8	1	77.9	49.4	1	2	1	0	0	3	2	3	2	43	43	0	1	0	2
55	22.5	12	2.3	2	2	46.4	105	50.4	0	52.5	56.4	2	2	2	0	0	3	2	4	2	42	42	0	0	0	3
46	27.1	0	2.2	1	0.5	40.5	172	42	2	344	43	1	1	1	0	0	1	3	1	2	45	45	0	2	0	3
49	29.2	0	2.8	15	0.5	47.6	123	63.1	4	246	50.1	1	2	1	0	1	2	3	1	2	45	10	2	2	0	3
47	22.1	0	3	1	1.4	39.8	263	42.2	1	187.9	46.8	2	2	2	0	0	2	2	1	2	48	48	0	1	0	3
73	21.9	0	2.3	9	0.5	40.8	108	50.3	3	216	43.3	1	2	1	0	1	2	2	1	2	60	9	1	2	0	3
54	21.3	0	1.2	5	1.5	43.2	308	49.7	1	205.3	50.7	1	1	1	1	0	1	2	1	1	13	60	0	1	0	3
49	21.7	0	3	2	0.5	45	211	47.5	2	422	47.5	1	1	1	0	0	2	2	1	2	49		0	2	0	3
50	25.1	0	2.1	3	1.9	43.5	249	48.4	0	131.1	53	1	1	1	0	0	1	3	1	2	55	55	0	0	0	3
63	24	0	3	7	0.9	48.4	250	56.3	3	277.8	52.9	2	2	1	1	0	1	3	1	2	23	60	1	2	0	3
52	21.6	0	4	4	1.1	46	249	51.1	2	226.4	51.5	2	2	1	1	0	1	2	1	2	6	60	0	2	0	2
66	28.1	0	1.8	2	0.3	43.1	116	45.4	2	386.7	44.6	1	1	1	0	0	1	3	1	1	59	59	0	2	0	2
48	20.9	0	2	1	1.5	40.5	244	43	1	162.7	48	2	2	2	0	0	1	2	1	1	60	60	0	1	0	2
50	25.4	1	4	2	0.7	43.4	230	46.1	2	328.6	46.9	2	2	2	0	0	2	3	2	2	58	58	0	2	0	2
49	22.9	0	3	2	1.5	44.4	74	47.9	1	49.3	51.9	1	1	1	0	0	1	2	1	2	55	55	0	1	0	2
49	28.7	4	2.5	5	2.3	41.1	271	48.4	0	117.8	52.6	1	1	2	1	0	3	3	3	2	15	53	0	0	0	2
56	23.5	0	2.5	2	1.8	39.4	301	43.2	0	167.2	48.4	2	2	1	0	0	1	2	1	2	48	48	0	0	0	1
64	20.4	5	1.8	6	1	42.7	323	49.7	2	323	47.7	1	2	1	1	1	3	2	3	1	18	48	0	2	0	1
69	19.1	3	1.5	2	1.6	47.5	134	51.1	1	83.8	55.5	1	1	1	0	0	2	2	2	1	52	52	0	1	0	1
69	20.7	11	2.7	9	1.6	32.4	373	43	4	233.1	40.4	1	1	1	1	1	3	2	4	2	12	16	1	1	2	1
63	26	0	1	6	0.9	40.1	201	47	2	223.3	44.6	1	1	2	1	0	1	3	1	1	10	46	0	2	0	1
66	20.7	4	1	12	1.5	32	334	45.5	4	222.7	39.5	2	2	1	1	1	3	2	3	1	19	22	1	1	2	1
65	26.5	0	2.5	2	1.2	42.4	62	45.6	1	51.7	48.4	1	1	1	0	0	2	3	1	2	56	56	0	1	0	1
61	26.3	1	1.5	3	0.3	44.4	163	47.7	2	543.3	45.9	1	1	1	0	0	1	3	2	1	50	50	0	2	0	1
48	27	4	2.5	1	0.7	41.5	132	43.2	2	188.6	45	1	1	1	0	0	3	3	3	2	51	51	0	2	0	1
56	25.3	0	2	19	1.4	35.5	249	55.9	4	177.9	42.5	1	1	2	1	1	1	3	1	1	14	18	2	1	1	1
47	21.6	0	4	4	1.8	48.8	140	54.6	0	77.8	57.8	1	1	1	0	0	2	2	1	2	53	53	0	0	0	2
50	23.3	0	2	2	1.5	39.3	141	42.8	1	94	46.8	2	2	1	0	0	1	2	1	1	55	55	0	1	0	2
60	20	0	1.2	15	1.4	32.3	333	48.7	5	237.9	39.3	2	2	1	1	1	1	2	1	1	20	26	2	1	2	2
60	30	0	2	6	2.2	43.1	140	51.3	0	63.6	54.1	1	1	1	0	0	1	3	1	1	55	55	0	0	0	3
47	18.1	0	2	4	0.7	41.1	98	45.8	2	140	44.6	1	1	1	0	0	1	1	1	1	48	48	0	2	0	3
59	24.5	0	1	8	0.8	40.1	202	48.9	3	252.5	44.1	1	1	1	1	0	1	3	1	1	13	47	1	2	0	3
47	20.8	0	2	5	0.9	45.2	152	51.1	2	168.9	49.7	1	1	1	0	0	1	2	1	1	48	48	0	2	0	1
62	20	0	2	1	0.6	42.4	170	44	2	283.3	45.4	1	1	1	0	0	1	2	1	1	47	47	0	2	0	1
48	19.5	0	2.5	2	2.2	43.4	145	47.6	0	65.9	54.4	2	2	1	0	0	2	2	1	2	58	58	0	0	0	1
57	24	0	2.7	3	1.9	44.7	243	49.6	0	127.9	54.2	1	2	1	0	0	2	3	1	2	60	60	0	0	0	1
57	22.5	0	2.5	2	1.1	40	205	43.1	2	186.4	45.5	1	2	2	0	0	2	2	1	2	54	54	0	2	0	2
54	19.8	0	0.9	7	0.5	45.5	145	53	3	290	48	2	2	1	0	0	1	2	1	1	65	65	1	2	0	2
44	22	0	2.5	3	2.1	48.4	186	53.5	0	88.6	58.9	1	2	1	0	0	2	2	1	2	65	65	0	0	0	2
57	23.1	10	2	2	2	44.8	229	48.8	0	114.5	54.8	2	2	1	0	0	3	2	4	1	60	60	0	0	0	2
67	25.4	1	2.6	3	1.1	26.8	156	30.9	4	141.8	32.3	2	2	1	0	0	2	3	2	2	58	58	0	2	2	2
51	24.2	0	1.5	15	1.5	31.2	312	47.7	5	208	38.7	1	1	2	1	1	3	3	1	1	5	12	2	1	2	2
55	23.4	0	2.5	5	1.6	38.2	120	44.8	2	75	46.2	1	1	1	0	0	1	2	1	2	48	48	0	1	1	3
54	24	0	2.5	3	1.1	41.1	148	45.2	2	134.5	46.6	1	1	1	0	0	2	3	1	2	50	50	0	2	0	3
67	30	19	2.7	9	1.2	35.8	124	46	3	103.3	41.8	1	1	1	0	1	3	3	4	2	60	6	1	1	1	3
49	26	0	2.5	6	0.8	39	188	45.8	2	235	43	2	2	1	1	0	2	3	1	2	15	60	0	2	0	3
59	23.9	1	2.5	9	0.8	38.8	325	48.6	3	406.2	42.8	1	1	2	1	0	3	2	2	2	5	60	1	2	0	3
63	22.3	11	4	8	1.1	38.1	394	47.2	4	358.2	43.6	1	1	1	1	0	3	2	4	2	8	60	1	2	1	3
48	22.9	0	1.5	2	1.3	47.4	216	50.7	1	166.2	53.9	2	2	2	0	0	2	2	1	1	56	56	0	1	0	3
53	21.5	0	1.6	9	1.7	43.9	235	54.6	1	138.2	52.4	1	2	1	1	0	1	2	1	1	16	55	1	0	0	3
59	22	2	2	8	0.9	34.9	219	43.8	4	243.3	39.4	1	2	1	1	0	1	2	2	1	19	58	1	2	1	2
59	22.7	0	3	4	1.6	42.4	150	48	1	93.8	50.4	1	1	1	0	0	2	2	1	2	56	56	0	1	0	2
53	27.3	1	2.5	6	2	40.6	140	48.6	0	70	50.6	1	2	1	0	0	1	3	2	2	48	48	0	0	0	2
62	21.4	0	1	2	1.6	43.6	149	47.2	1	93.1	51.6	1	1	1	0	0	1	2	1	1	58	58	0	1	0	2
63	22	0	3.3	1	1.3	41.9	146	44.2	1	112.3	48.4	2	2	2	0	0	2	2	1	2	58	58	0	1	0	2
52	22.2	0	1.5	3	1.6	38.4	195	43	2	121.9	46.4	1	1	1	0	0	1	2	1	1	57	57	0	1	1	2
64	23.1	0	4	2	0.6	42.2	146	44.8	2	243.3	45.2	1	2	1	0	0	2	2	1	2	49	49	0	2	0	3
51	20.6	0	3	11	1	37.8	180	49.8	4	180	42.8	1	2	1	1	0	2	2	1	2	5	52	1	2	1	3
55	23.7	0	2.5	3	1.2	43.7	113	47.9	1	94.2	49.7	1	1	1	0	0	1	2	1	2	55	55	0	1	0	3
68	27.6	0	2.3	15	0.6	35.9	150	51.5	5	250	38.9	1	2	1	0	1	2	3	1	2	60	18	2	2	1	3
59	25	11	2.5	11	1.7	37.7	263	50.4	2	154.7	46.2	1	1	1	1	0	3	3	4	2	13	60	1	0	1	3
44	22.6	0	1.3	2	2.1	39.4	325	43.5	0	154.8	49.9	1	1	1	0	0	1	2	1	1	55	55	0	0	0	3
54	25.8	0	2	2	0.5	38.8	350	41.3	2	700	41.3	1	1	1	0	0	1	3	1	1	48	48	0	2	0	3
47	24	1	2	8	1.5	39.3	154	48.8	2	102.7	46.8	1	2	1	1	0	1	3	2	1	16	45	1	1	0	2
67	20.8	0	2.8	6	0.9	41.8	384	48.7	2	426.7	46.3	2	2	1	0	1	2	2	1	2	60	24	0	2	0	2
59	40.5	0	3.5	1	1.3	39.1	206	41.4	1	158.5	45.6	2	2	1	0	0	2	3	1	2	58	58	0	1	0	2
63	24.7	0	1.5	12	1.9	40.2	105	54.1	1	80.8	49.7	1	1	2	1	0	1	3	1	1	6	58	1	0	0	2
67	24.7	11	3	15	1	40.6	100	56.6	4	100	45.6	1	1	2	1	1	3	3	4	2	28	30	2	2	0	2
47	27.6	5	4	12	1.5	37.5	140	51	3	93.3	45	1	1	1	1	0	2	3	3	2	14	58	1	1	1	2
59	30	11	1.5	15	0.8	35.9	112	51.7	5	140	39.9	1	1	1	1	1	3	3	4	1	32	36	2	2	1	2
53	22.8	3	1	20	0.7	30.3	215	51	6	307.1	33.8	2	2	1	1	1	2	2	2	1	28	30	2	2	2	2
51	24.8	0	2.2	2	0.8	39.2	227	42	2	283.8	43.2	1	1	1	0	0	2	3	1	2	48	48	0	2	0	1
57	24	0	1	1	1.4	39.4	325	41.8	1	232.1	46.4	1	2	1	0	0	2	3	1	1	57	57	0	1	0	1
53	24.1	1	4	2	1.3	42.4	122	45.7	1	93.8	48.9	1	2	1	0	0	2	3	2	2	55	55	0	1	0	1
44	25.7	1	2.5	17	1.4	35.9	380	54.3	4	271.4	42.9	1	1	2	1	1	2	3	2	2	26	35	2	1	1	1
52	28	0	2.5	3	2.4	40.3	260	45.7	0	108.3	52.3	2	2	1	0	0	2	3	1	2	57	57	0	0	0	1
54	24.8	0	2	4	1.7	40.8	191	46.5	0	112.4	49.3	1	1	1	0	0	1	3	1	1	45	45	0	0	0	1
66	27.6	1	3	9	1.4	44.6	230	55	2	164.3	51.6	2	2	1	1	0	1	3	2	2	25	57	1	1	0	1
64	21.7	0	1.8	1	2.6	39.6	200	43.2	0	76.9	52.6	1	2	1	0	0	2	2	1	1	60	60	0	0	0	1
65	16	1	2	8	1	45.3	345	54.3	3	345	50.3	1	2	1	0	1	3	1	2	1	60	8	1	2	0	1
69	25.2	18	2	150	0.8	46.4	284	197.2	4	355	50.4	1	1	1	1	1	3	3	4	1	21	30	2	2	0	2
49	30.1	18	5	8	0.8	41.1	210	49.9	3	262.5	45.1	2	2	1	1	0	3	3	4	2	25	60	1	2	0	2
62	19.7	0	2	4	2.6	39.4	300	46	0	115.4	52.4	2	2	1	0	0	3	2	1	1	55	55	0	0	0	2
70	26.2	1	3	6	1.7	34.6	342	42.3	2	201.2	43.1	2	2	1	0	1	3	3	2	2	45	15	0	0	2	2
68	23.4	0	6	6	2.7	42.4	224	51.1	0	83	55.9	2	2	1	0	0	3	2	1	3	60	60	0	0	0	2
53	20	0	3	15	1	39.7	258	55.7	4	258	44.7	1	1	1	1	0	3	2	1	2	14	60	2	2	0	2
50	26	18	5	14	1	33.9	256	48.9	6	256	38.9	1	2	1	1	1	3	3	4	2	13	20	2	2	2	2
53	24.7	0	3	3	1.8	38.5	300	43.3	0	166.7	47.5	1	2	1	0	0	1	3	1	2	45	45	0	0	0	1
